# Supplementary figures and images for: Heat Treatment and Dynamic Mechanical Analysis Strain Sweep Effects on the Phase Structure and Morphology of an Fe-28Mn-6Si-5Cr Shape Memory Alloy
Source: MDPI journal article supplement (doi:10.3390/nano13071250), 2023-04-01

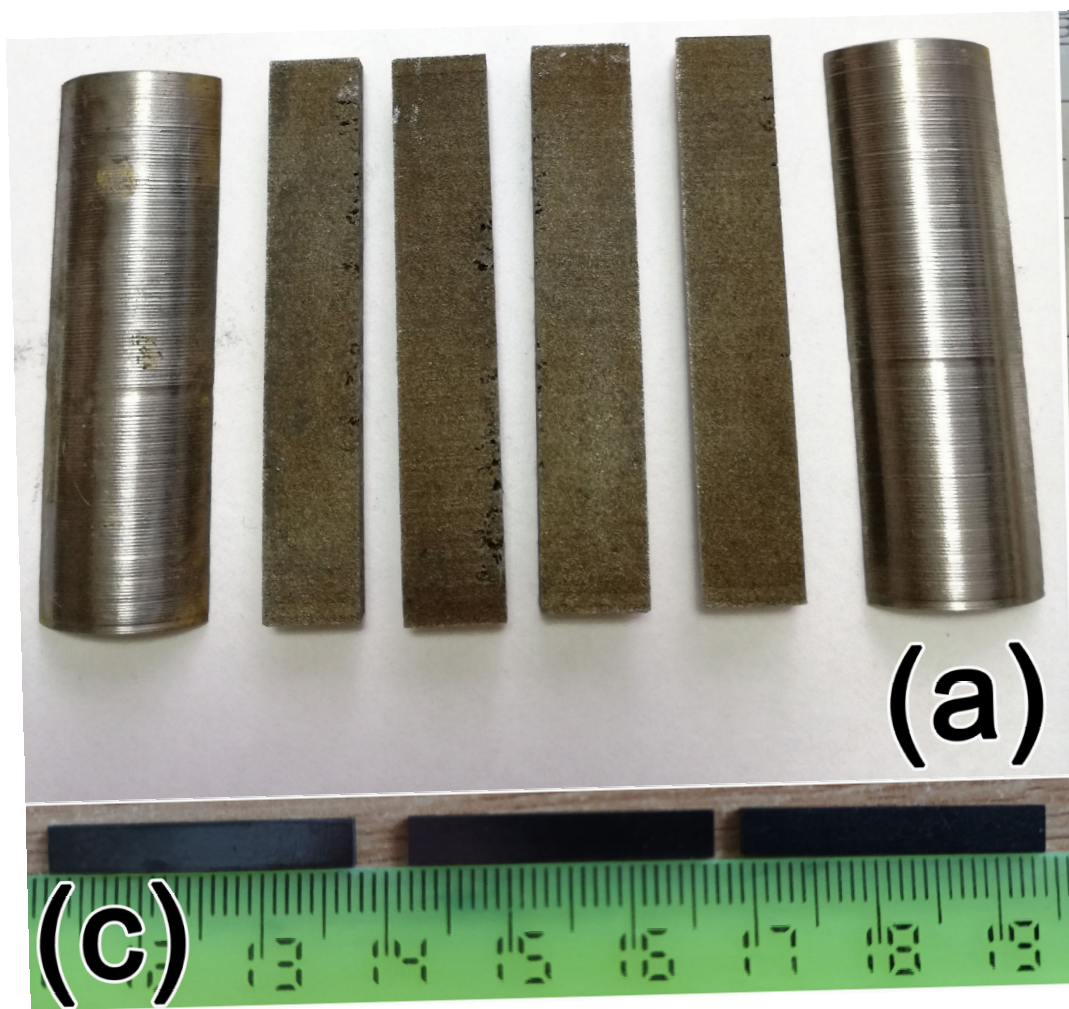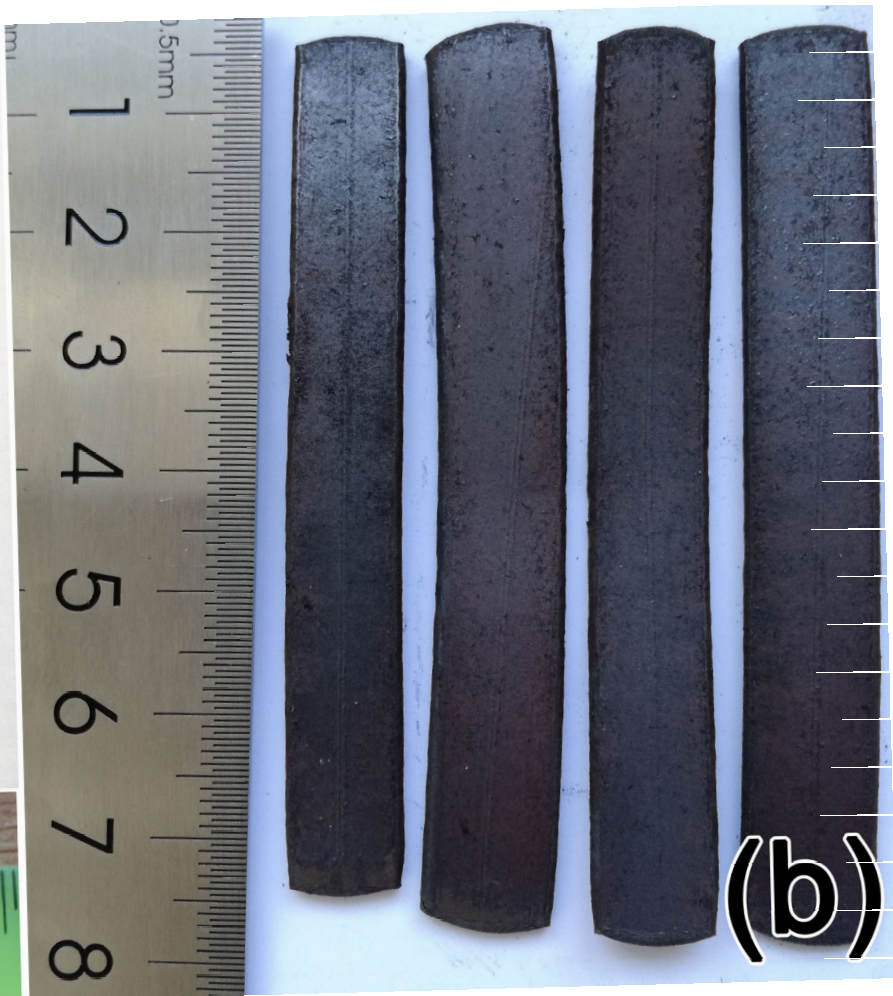

Supplement: s1 [file s1]
